# Supplementary material for: LEM Domain Containing 1 Acts as a Novel Oncogene and Therapeutic Target for Triple-Negative Breast Cancer
Source: MDPI journal article supplement (doi:10.3390/cancers15112924), 2023-05-26
Supplement: s1 [file s1]

## Supplementary materials:

**Title:** LEM domain containing 1 acts as a novel oncogene and therapeutic target for triple-negative breast cancer

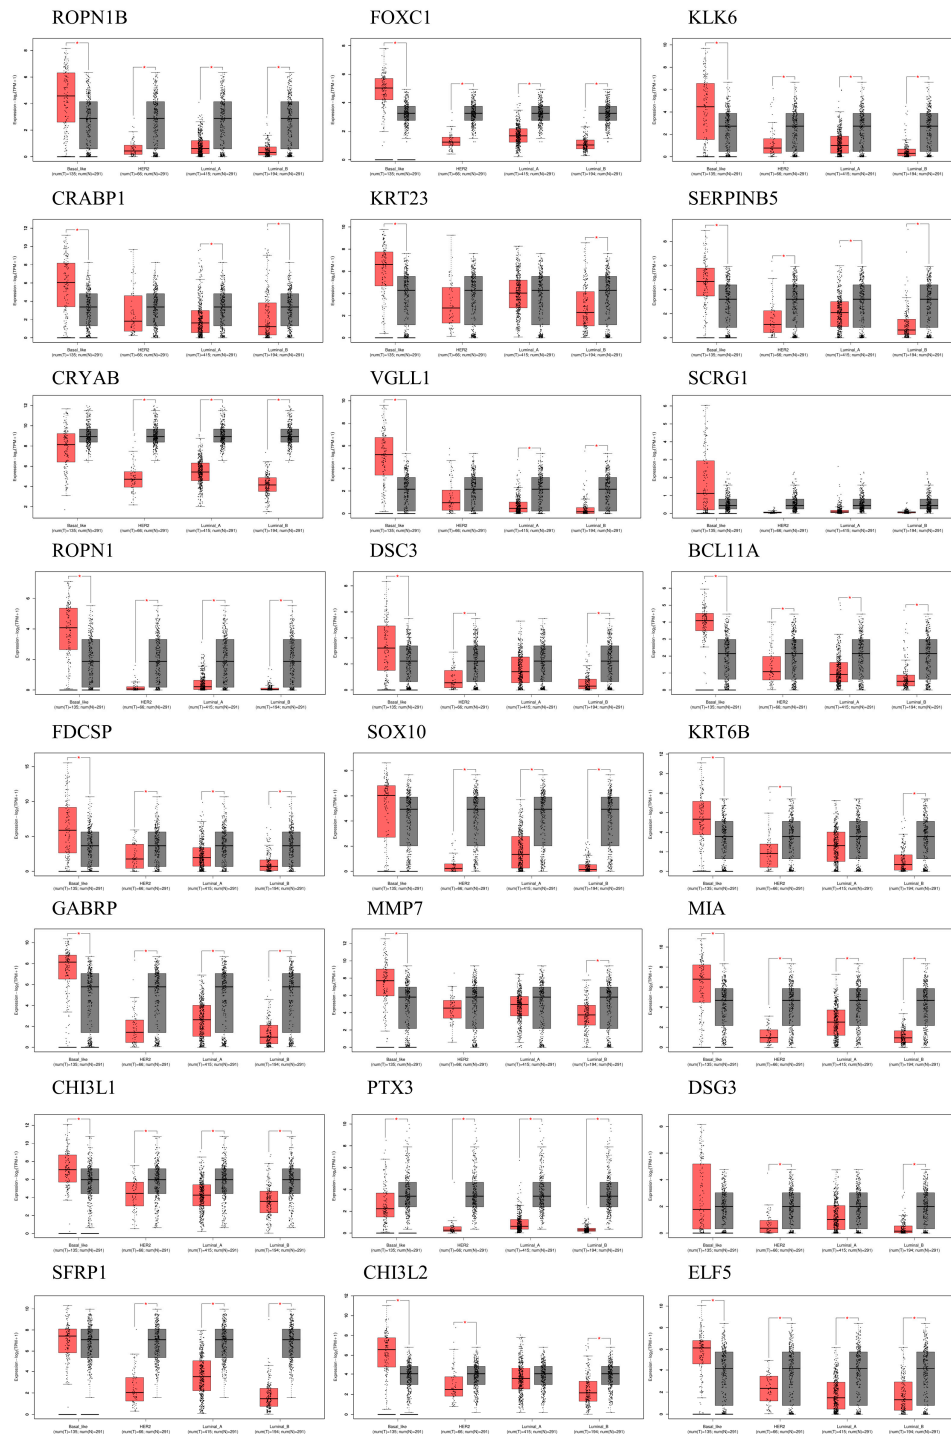

**Figure S1.** The expressions of other 24 genes in breast cancer from GEPIA.

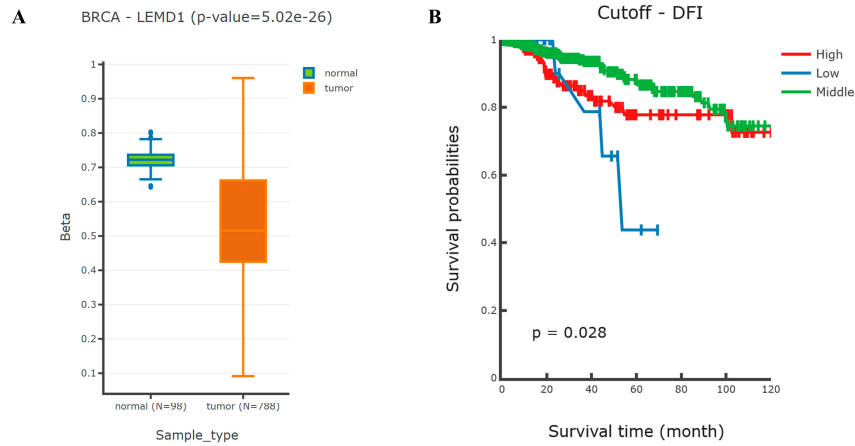

**Figure S2. The methylation analysis of LEMD1 in breast cancer. (A)** LEMD1 DNA methylation levels in normal and tumor samples of breast cancer patients. **(B)** The correlation between LEMD1 methylation levels and the disease-free interval (DFI) in breast cancer patients.

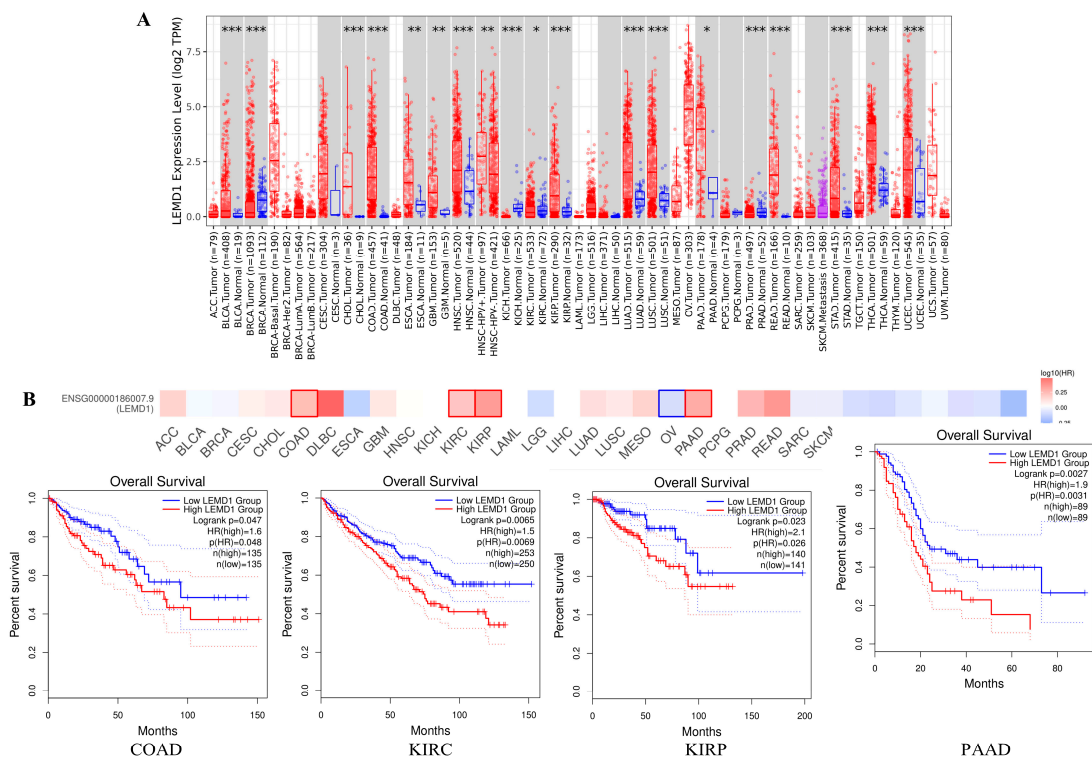

**Figure S3. Pan-cancer analysis of LEMD1 expression and the prognostic value. (A)** The mRNA expressions of LEMD1 in cancers from TCGA. **(B)** GEPIA2 was used to perform the overall survival analysis by LEMD1 expression among various tumors by analyzing data from TCGA database. The survival map and the Kaplan-Meier curves with statistical significance were exhibited.

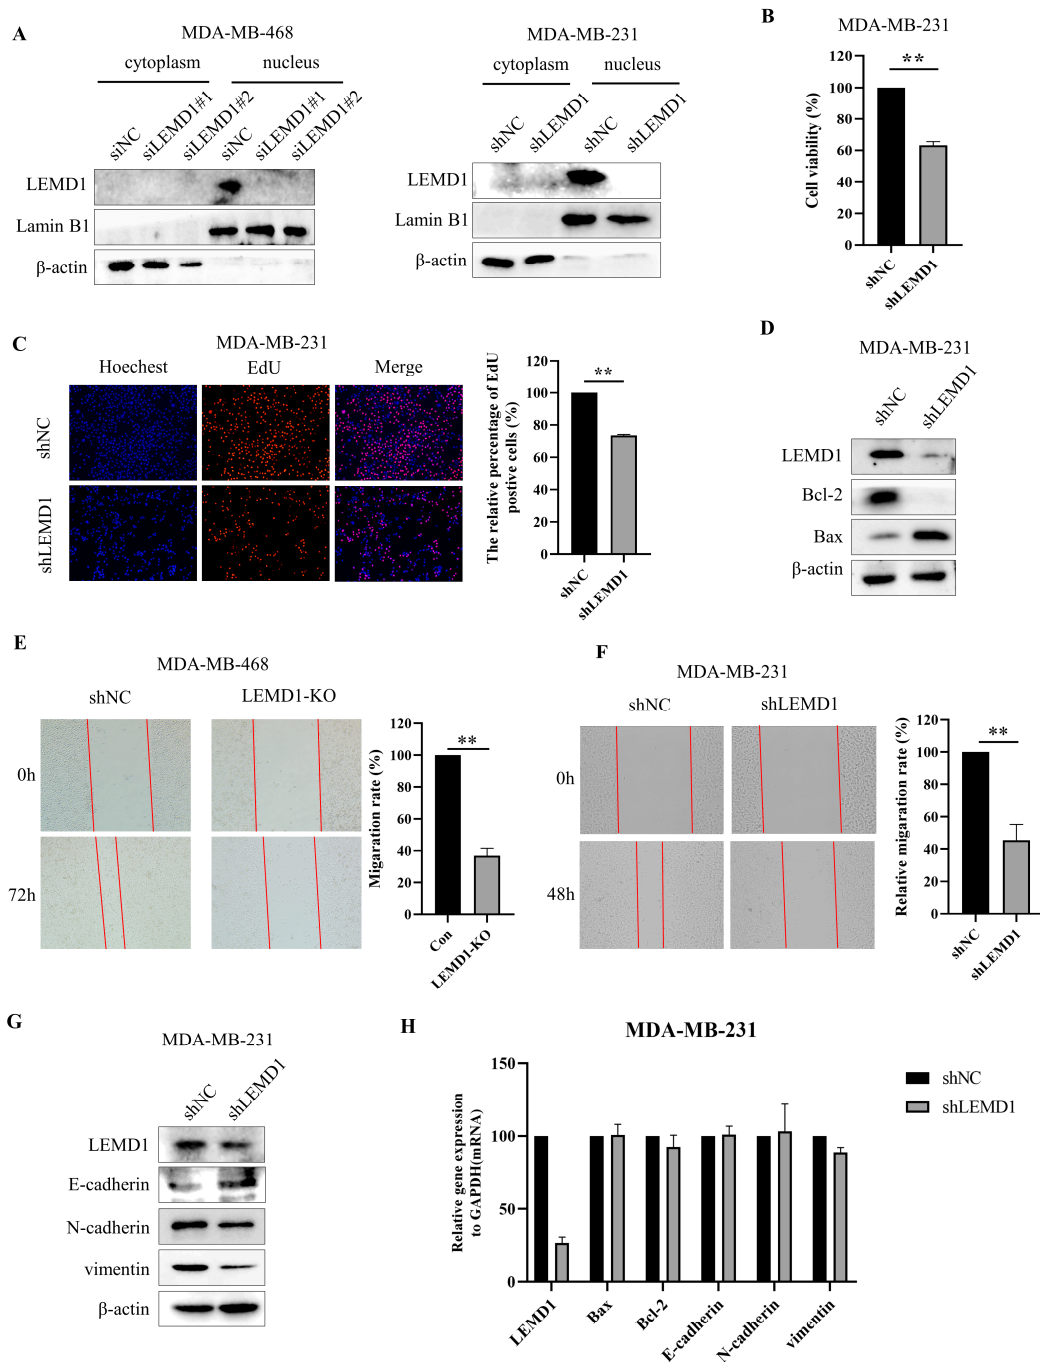

**Figure S4. The localization and the oncogenic function of LEMD1 in TNBC cells.** (A) The expression of LEMD1 was detected in cytoplasm and nucleus by Western blot.  $\beta$ -actin was used as the cytoplasmic loading control, and Lamin B1 was used as the nuclear loading control. (B) MDA-MB-231 cells were transfected with shRNA or a negative control, CCK-8 reagent was applied to examine cell viability.  $**p < 0.01$ ,  $n=3$ . (C) Cell proliferation of MDA-MB-231 cells was measured using EdU. Magnification,  $\times 100$ .  $**p < 0.01$ ,  $n=3$ . (D) Western blot analysis of the expressions of Bcl-2 and Bax in MDA-MB-231 cells,  $\beta$ -actin was used as a loading control. (E) Wound healing assays of LEMD1-knockout MDA-MB-468 cells. Magnification,  $\times 100$ .  $**p < 0.01$ ,  $n=3$ . (F) Wound healing assays of LEMD1-knockdown MDA-MB-231 cells. Magnification,  $\times 100$ .  $**p < 0.01$ ,  $n=3$ . (G) Western blot

analysis of the expressions of E-cadherin, N-cadherin and vimentin in MDA-MB-231 cells,  $\beta$ -actin was used as a loading control. **(H)** qPCR analysis of the mRNA expressions of Bax, Bcl-2, E-cadherin, N-cadherin and vimentin in MDA-MB-231 cells.

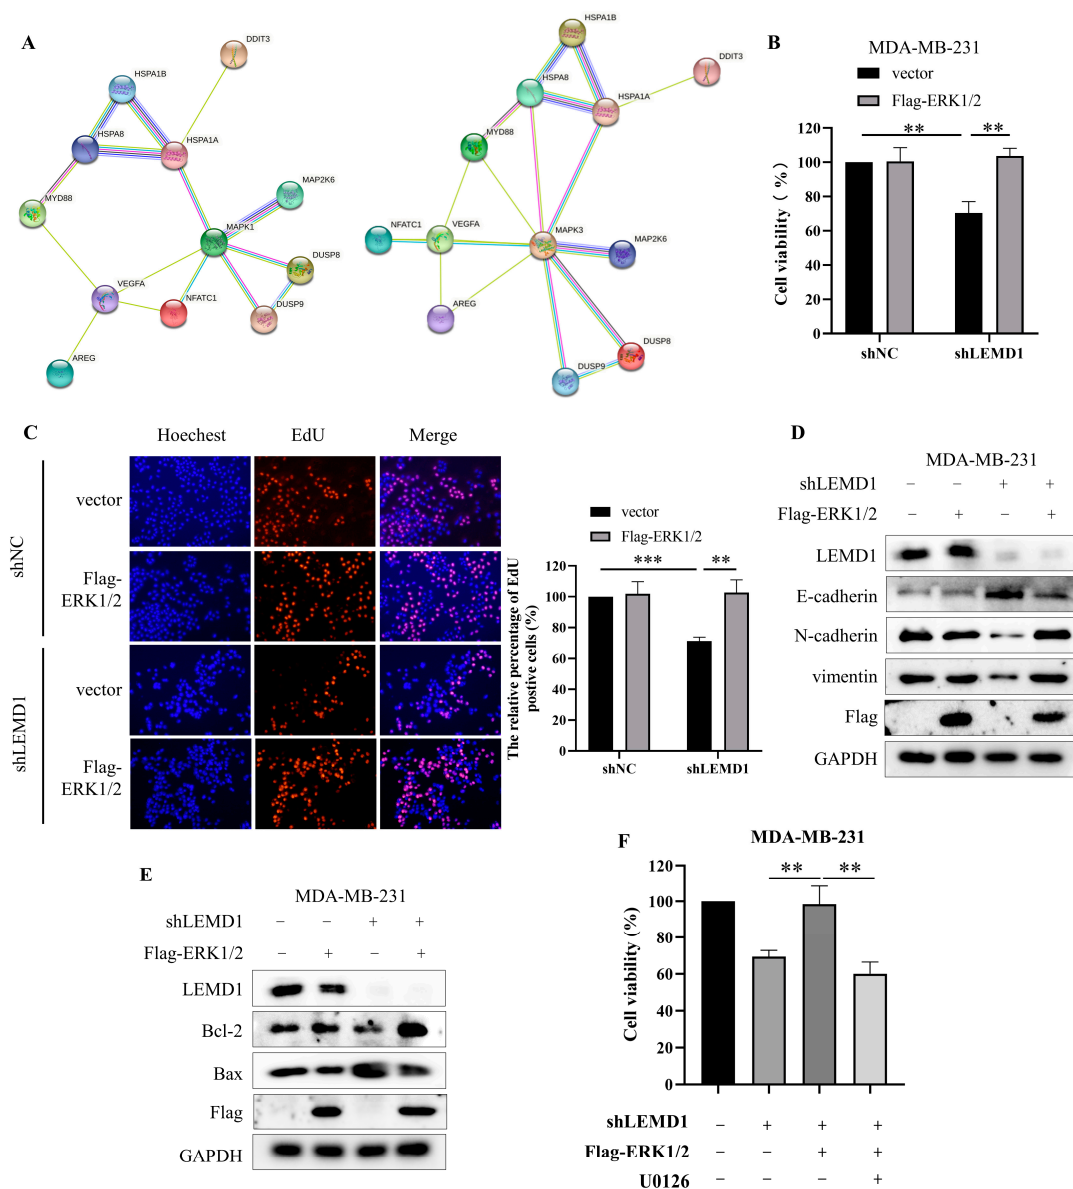

**Figure S5. LEMD1 promotes the cell proliferation and invasion by activating ERK in TNBC. (A)** The PPI network for ERK1 (MAPK3), ERK2 (MAPK1) and the 11 differential genes with significant variation in MAPK signaling pathway from RNA-seq. LEMD1-knockdown MDA-MB-231 cells were transfected with ERK plasmid or empty vector plasmid. **(B)** Cell viability was measured using the CCK8 assay. **(C)** Cell proliferation was measured by EdU assay. Magnification,  $\times 200$ . **(D)** The protein expressions of EMT markers including E-cadherin, N-cadherin, vimentin, and **(E)** The expressions of Bcl-2 and Bax in LEMD1-knockdown MDA-MB-231 cells were measured by Western blot. GAPDH was used as a loading control. **(F)** LEMD1-knockdown MDA-MB-231 cells were transfected



with ERK plasmid and then treated with U0126 for 24h. Cell viability was measured using the CCK8 assay.

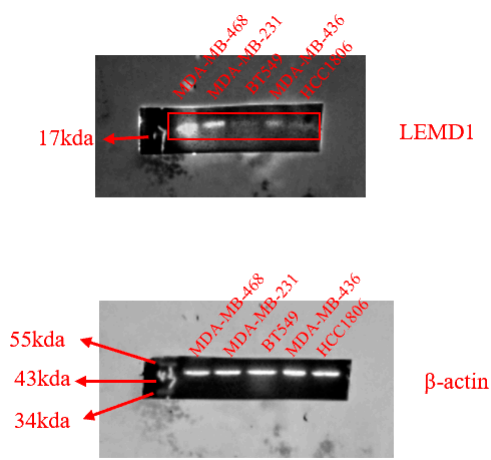

Figure S6A TNBC cell lines

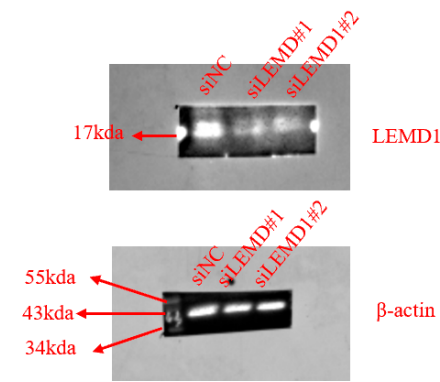

Figure S6A MDA-MB-468-knockdown

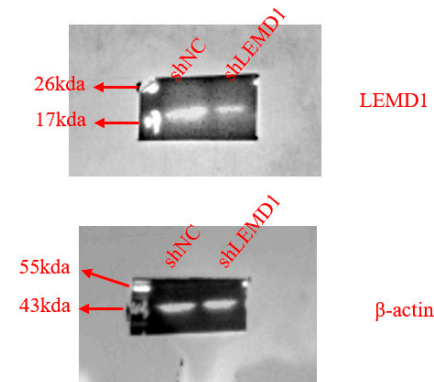

Figure S6A MDA-MB-231-knockdown

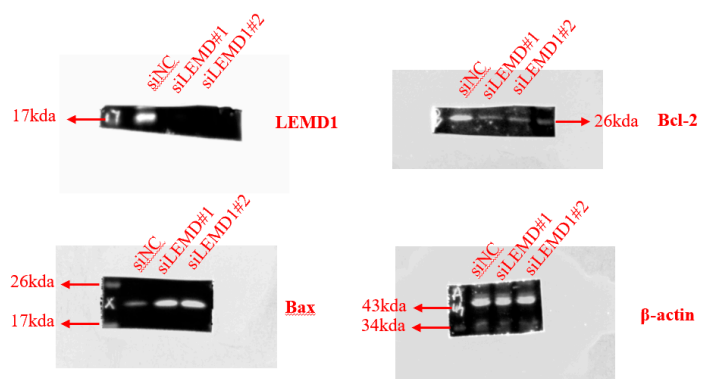

Figure S6A MDA-MB-468-apoptosis

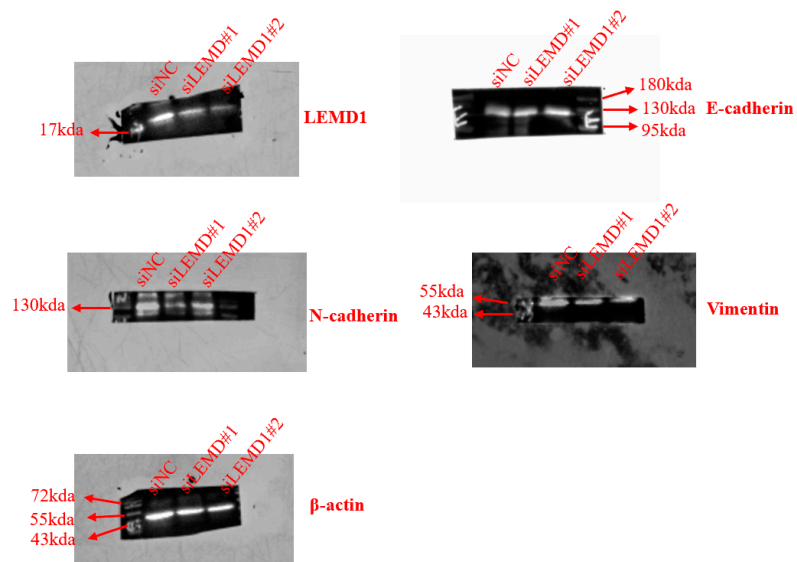

Figure S6A MDA-MB-468-EMT

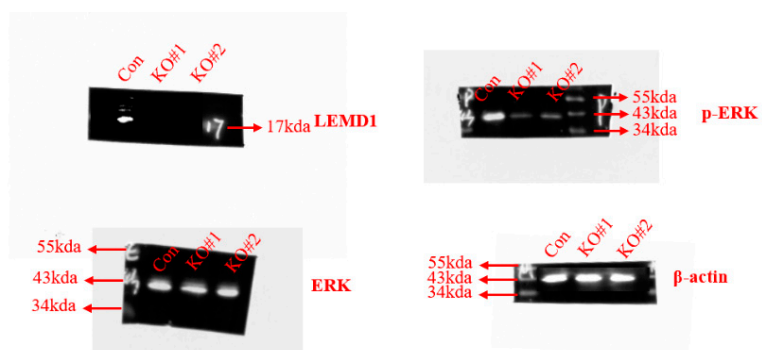

Figure S6B MDA-MB-468-ERK

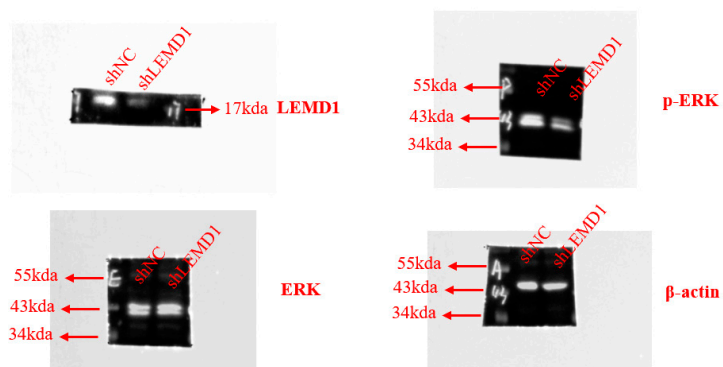

Figure S6B MDA-MB-231-ERK

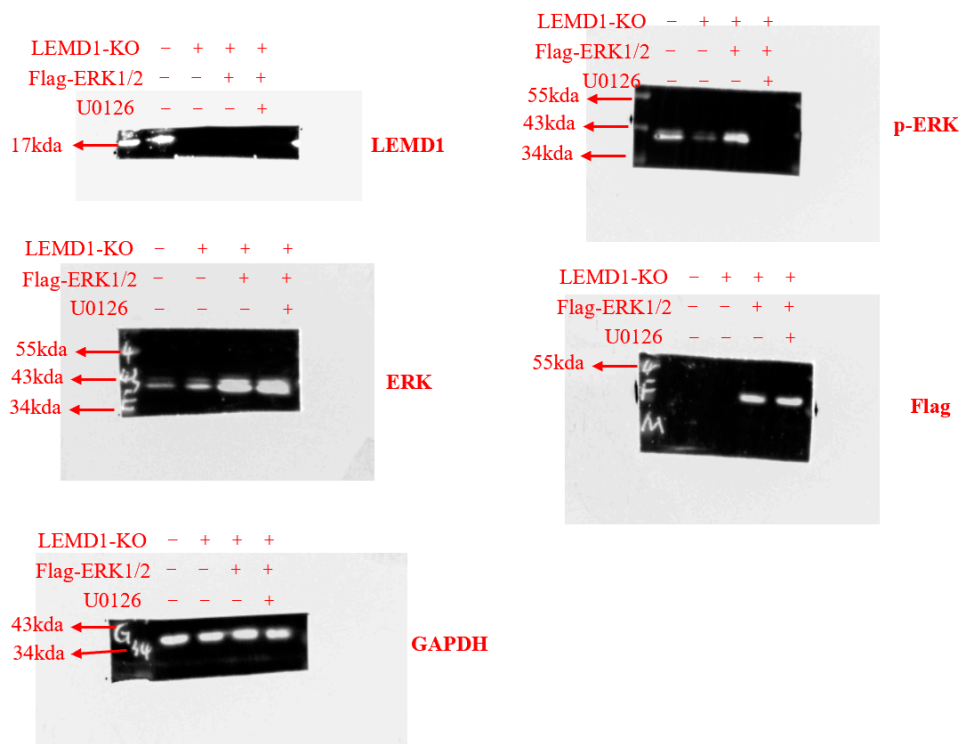

Figure S6B MDA-MB-468-U0126

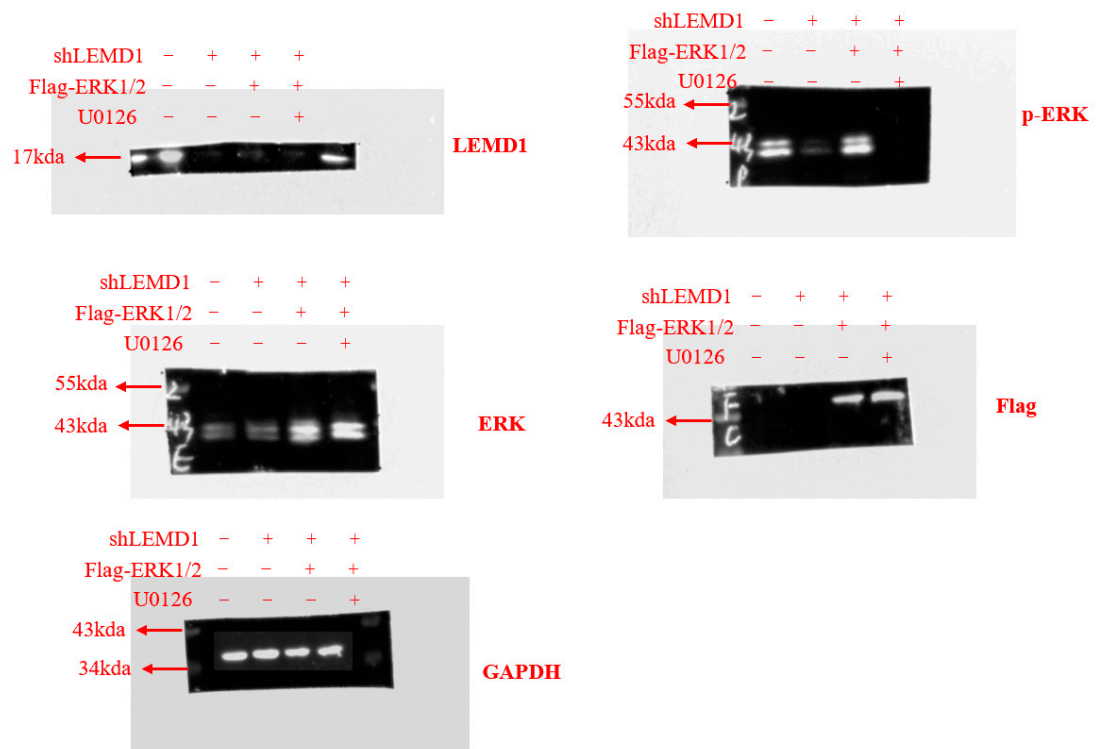

Figure S6B MDA-MB-231-U0126

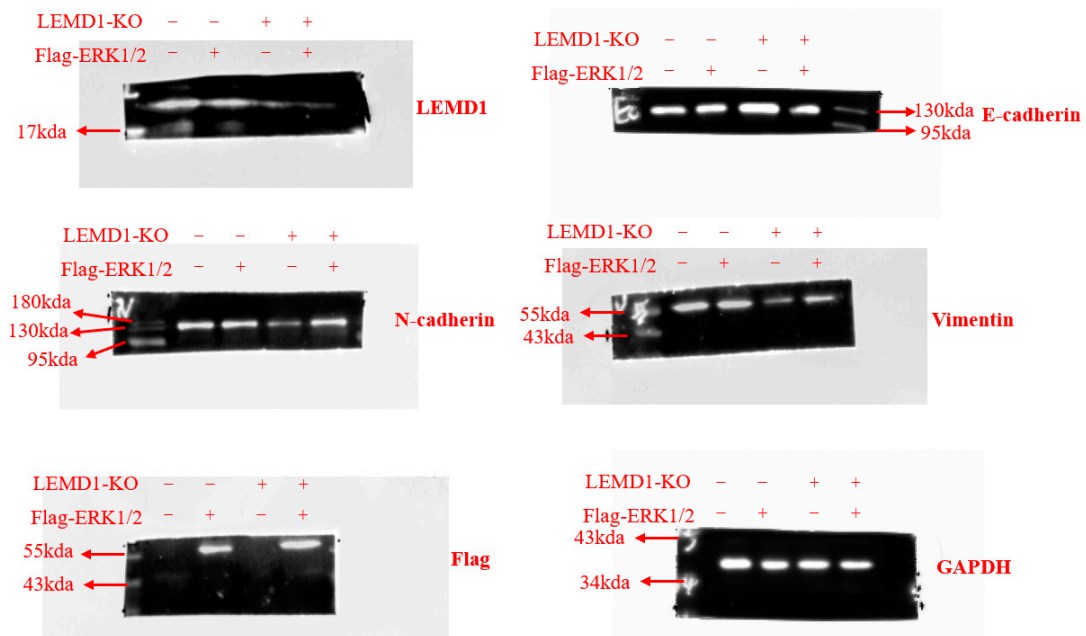

Figure S6B MDA-MB-468-EMT

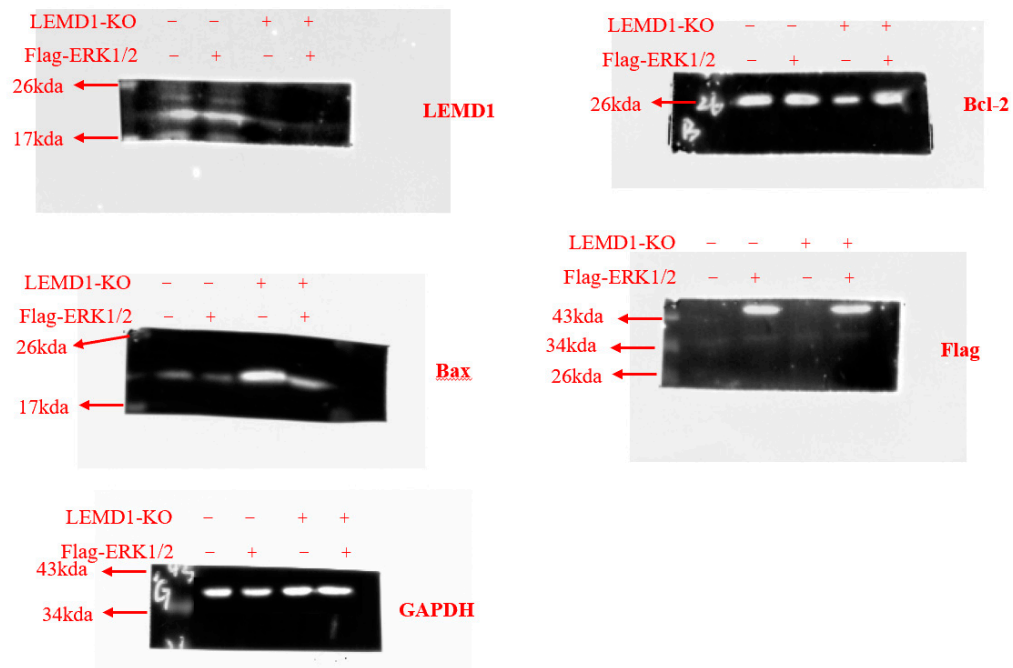

Figure S6B MDA-MB-468-apoptosis

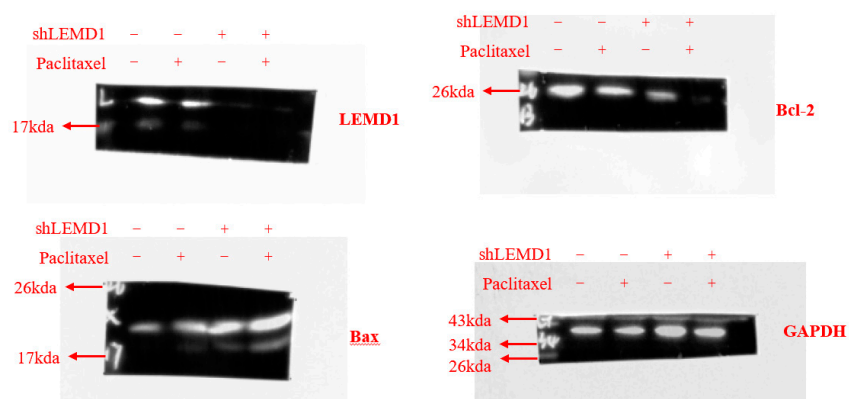

Figure S6C MDA-MB-231-apoptosis
